# Supplementary material for: Development of a High-Performance Thin-Layer Chromatography Method for the Quantification of Alkyl Glycerolipids and Alkenyl Glycerolipids from Shark and Chimera Oils and Tissues
Source: MDPI journal article supplement (doi:10.3390/md20040270), 2022-04-18
Supplement: s1 [file s1]

### Supplementary Materials:

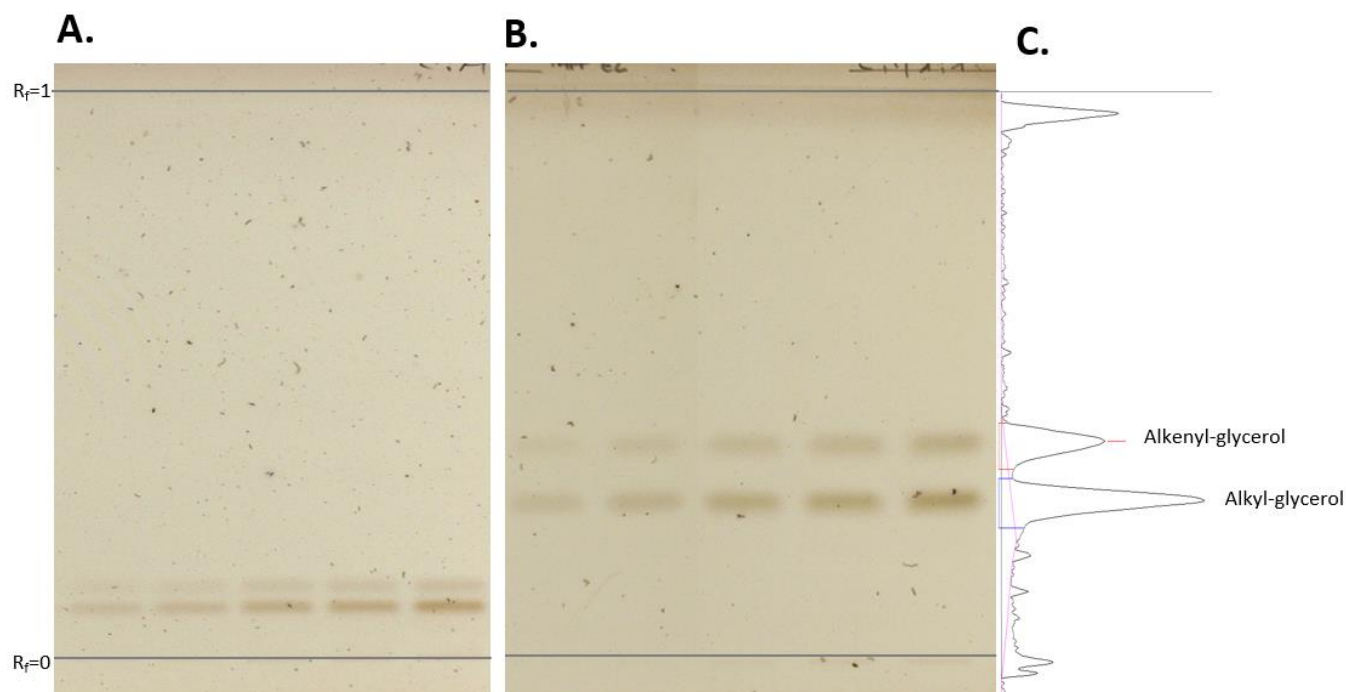

**Figure S1. Optimization of the mobile phase.** 2 to 6  $\mu\text{g}$  of each alkyl- and alkenyl-glycerol standard were co-deposited from left to right at  $R_f=0$  and eluted in different mobile phases until  $R_f=1$ . The carbonization was the same for both plates. A. Elution was carried out in petroleum ether : diethyl ether : acetic acid (60:40:1; v/v/v). Alkyl- and alkenyl-glycerol standards are only slightly separated. B. Elution was carried out in petroleum ether : diethyl ether : acetic acid (30:70:0.5; v/v/v). Alkyl- and alkenyl-glycerol standards are clearly separated. C. Densitometric profile obtained for the HPTLC plate shown in B, 5<sup>th</sup> lane (5  $\mu\text{g}$ /band)

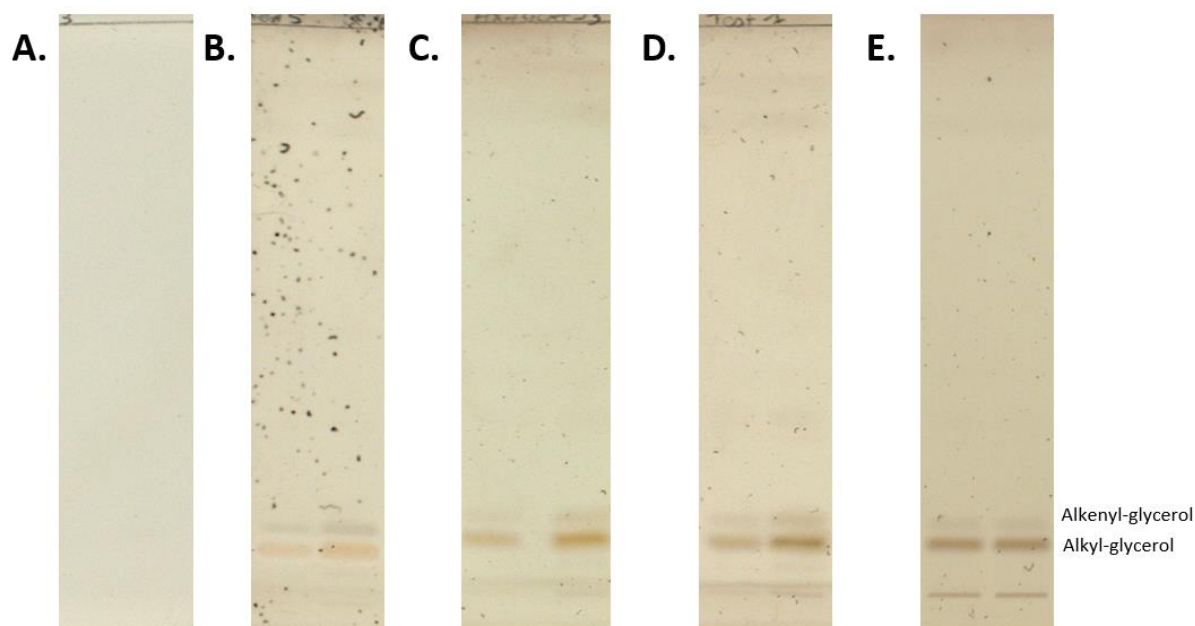

**Figure S2. Optimization of the staining and carbonization reactions.** The staining conditions tested on parts of HPTLC plates for 5 and 6  $\mu\text{g}$  of alkyl- and alkenyl-glycerol standard per band were the following: A. Staining by 30 seconds dipping in acetic acid : sulfuric acid : absolute ethanol (20:1:170, v/v/v), carbonization for 10 minutes at 130°C. No carbonization of the alkyl- and alkenyl-glycerol occurred. B. Staining by 30 seconds dipping in 25% sulfuric acid in absolute ethanol, carbonization for 5 minutes at 130°C. The plate was too damaged after carbonization to enable the densitometric analysis. C. Staining by 30 seconds dipping in 5% sulfuric acid in absolute ethanol, carbonization for 11 minutes and 30 seconds at 130°C. The carbonization was incomplete resulting in a bias of quantification. D. Staining by 30 seconds dipping in 8% sulfuric acid in absolute ethanol, carbonization for 10 minutes at 130°C. The resulting bands of alkyl- and alkenyl-glycerol were too diffuse for a precise quantification. E. Staining by 50 seconds dipping in 7% sulfuric acid in absolute ethanol, carbonization for 14 minutes at 140°C. These were the best conditions found.

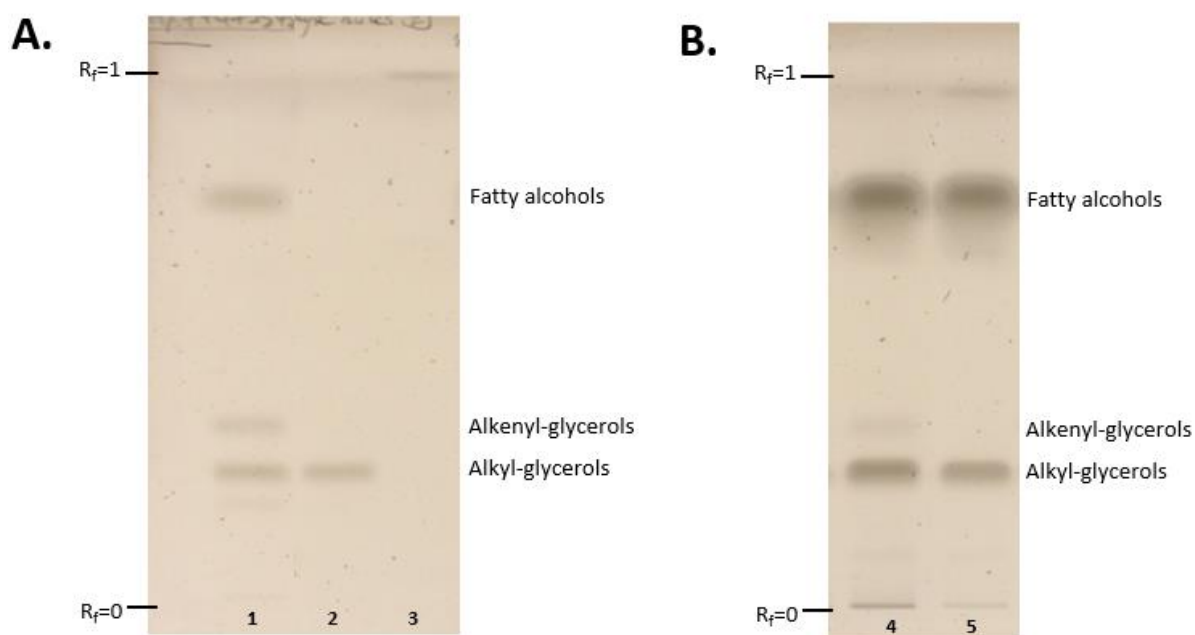

**Figure S3. Confirmation of the identity of the alkenyl-glycerol species by HPTLC after acid hydrolysis of the ether-glycerol standards and the chimera liver oil sample.** A. 5  $\mu$ g of alkyl- and alkenyl-glycerol standards were deposited before and after acid hydrolysis as follows: lane 1: alkyl- and alkenyl-glycerol co-deposited before acid hydrolysis with 5  $\mu$ g of fatty alcohol standard; lane 2: alkyl-glycerol standard after acid hydrolysis; lane 3: alkenyl-glycerol standard after acid hydrolysis. B. Total reduced lipids of chimera liver oil were deposited before (lane 4) and after (lane 5) acid hydrolysis.

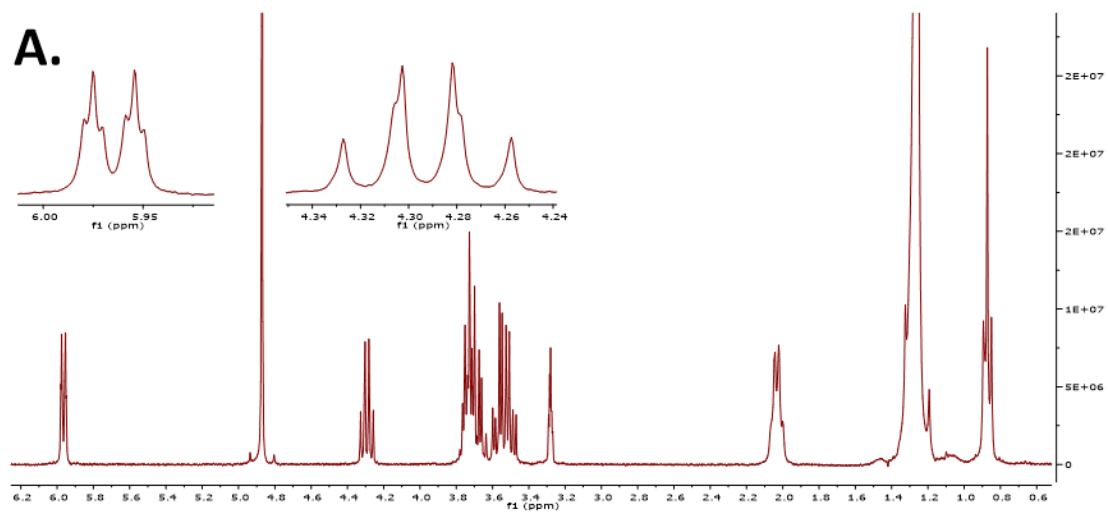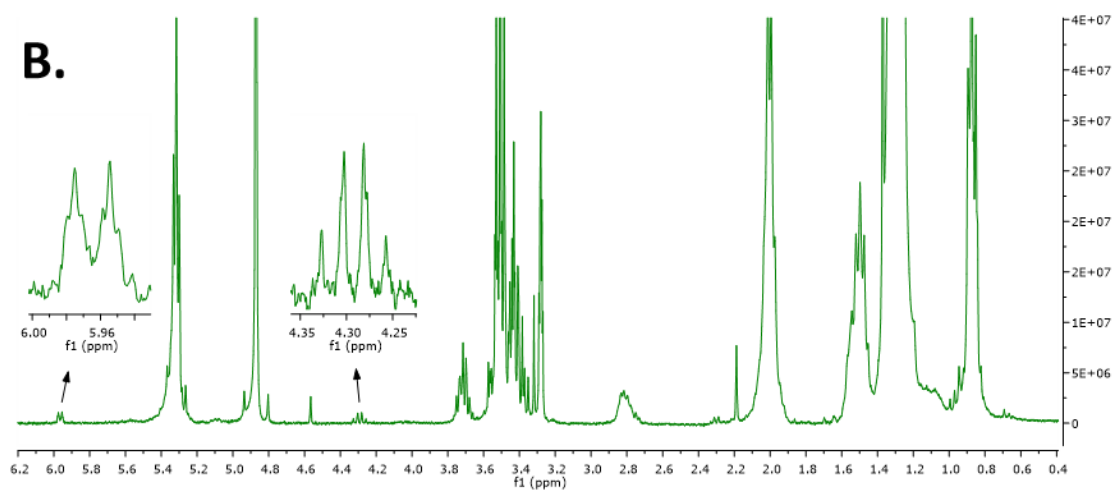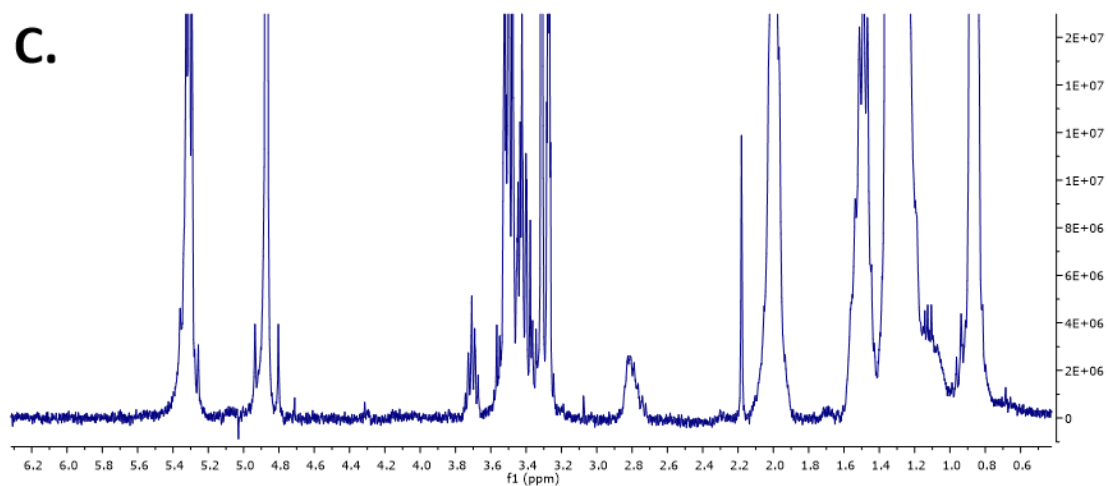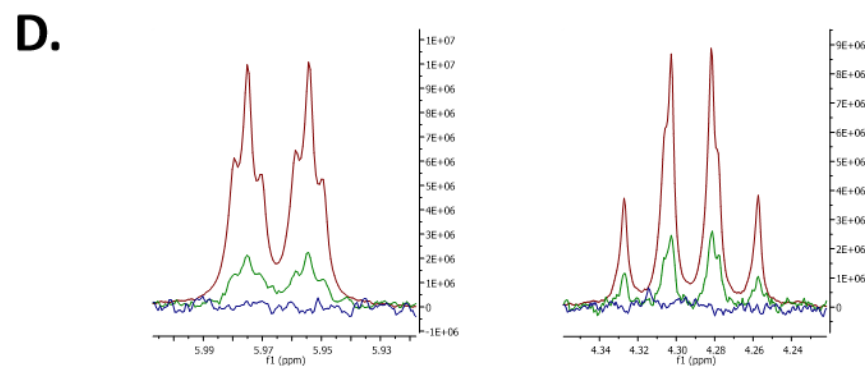

**Figure S4.** Confirmation of the identity of the alkenyl glycerol species by  $^1\text{H}$  NMR after acid hydrolysis of the alkenyl glycerol standard and the chimera liver oil sample.  $^1\text{H}$  NMR spectra of the commercial standard of alkenyl glycerol (**A.**, red) and reduced lipids from chimera liver oil sample before (**B.**, green) and after (**C.**, blue) acid hydrolysis. The regions at 4.3 and 5.9 ppm showing the multiplets corresponding to the vinylic protons have been expanded and overlaid (**D.**) to highlight the disappearance of the vinylic multiplets after acid hydrolysis.

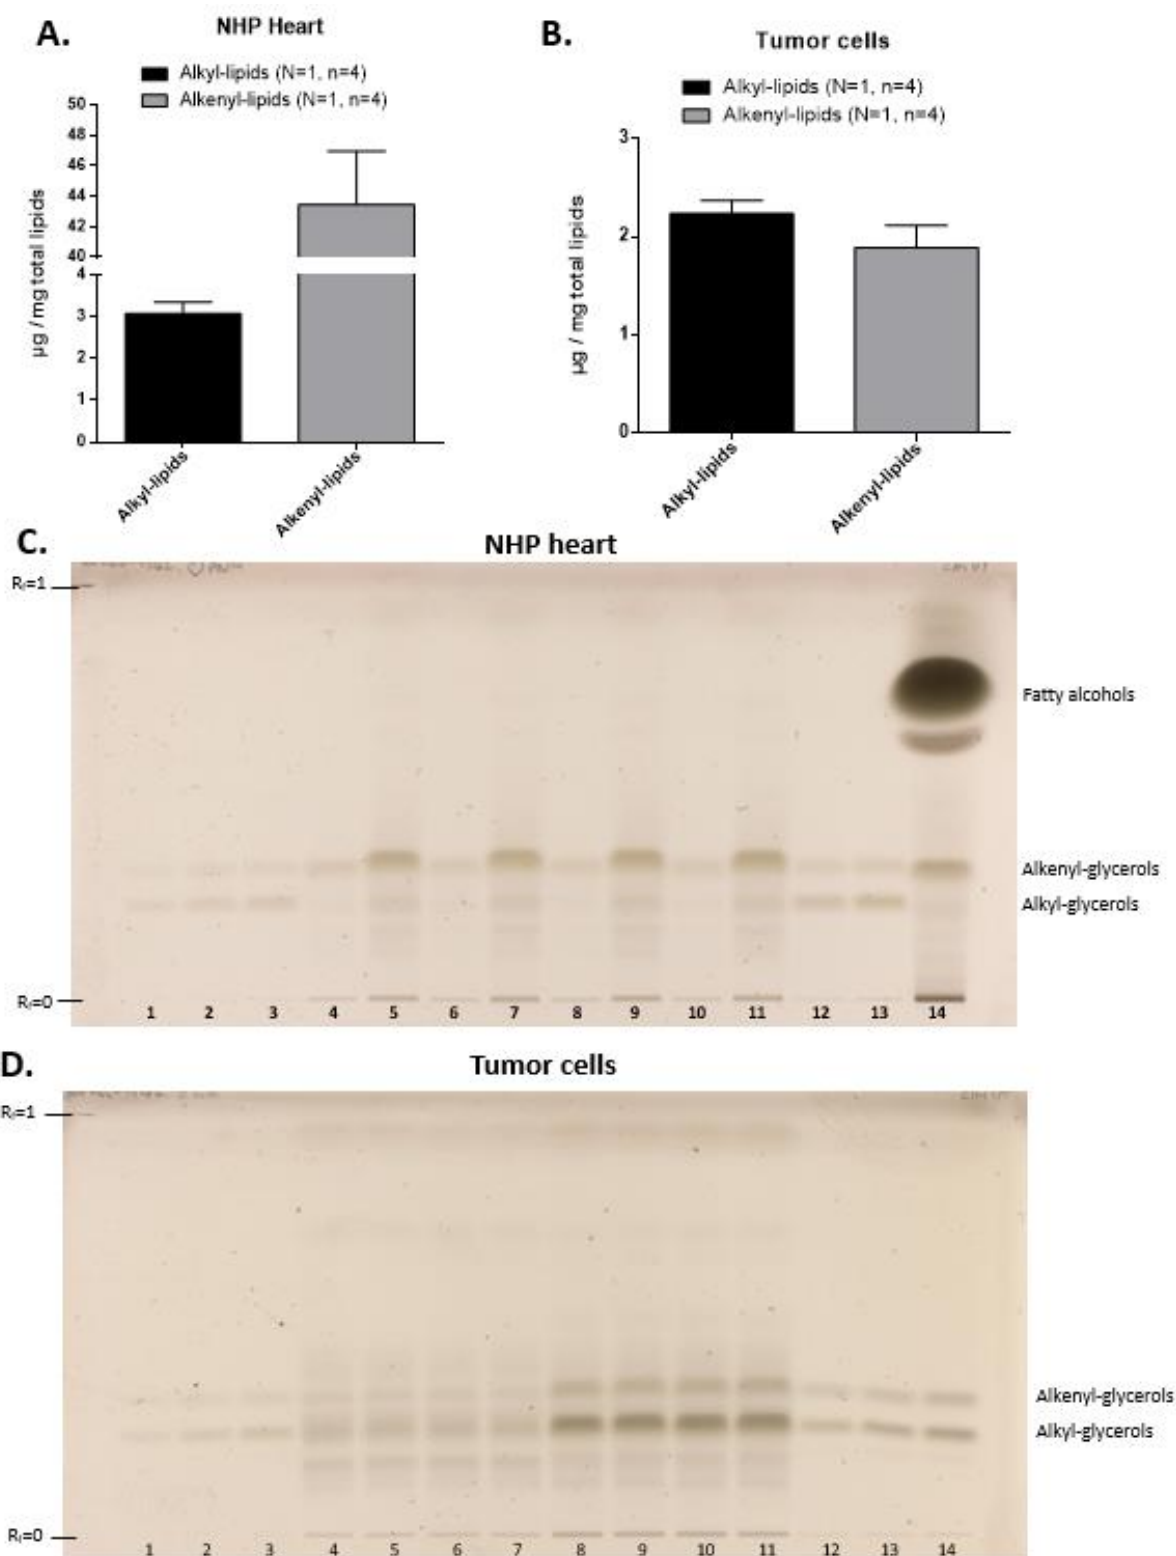

**Figure S5. Results observed with the proposed HPTLC method applied to NHP heart muscle and tumor tissues.** The quantity of ether-lipids was calculated by quantifying the amount of ether-glycerols by HPTLC-densitometry and relativized to the total quantity of lipids in the sample. The results are given in µg of ether-lipids per mg of total lipids and shown as mean ± SD. The quantification is possible in matrixes such as: A. NHP heart tissues, and B. tumor tissues. For each sample type, one sample of total lipids has been reduced, purified and applied four times on HPTLC (N=1, n=4). C. HPTLC plate for

NHP heart samples. The samples were deposited as follows: lanes 1 to 3 and 12 to 13: ether-glycerol standards; lanes 4 to 11: purified reduced lipids from one NHP sample deposited four different times in two different amounts to quantify alkyl-lipids (on lanes 5, 7, 9 and 11) and alkenyl-lipids (on lanes 4, 6, 8 and 10) (N=1, n=4); lane 14: non purified NHP sample. D. HPTLC plate for tumor samples. The samples were deposited as follows: lanes 1 to 3 and 12 to 14: ether-glycerol standards; lane 4 to 7: purified reduced lipids from one tumor sample deposited 4 times (N=1, n=4); lane 8 to 12: the results are above the limit of linearity and were not taken into account.

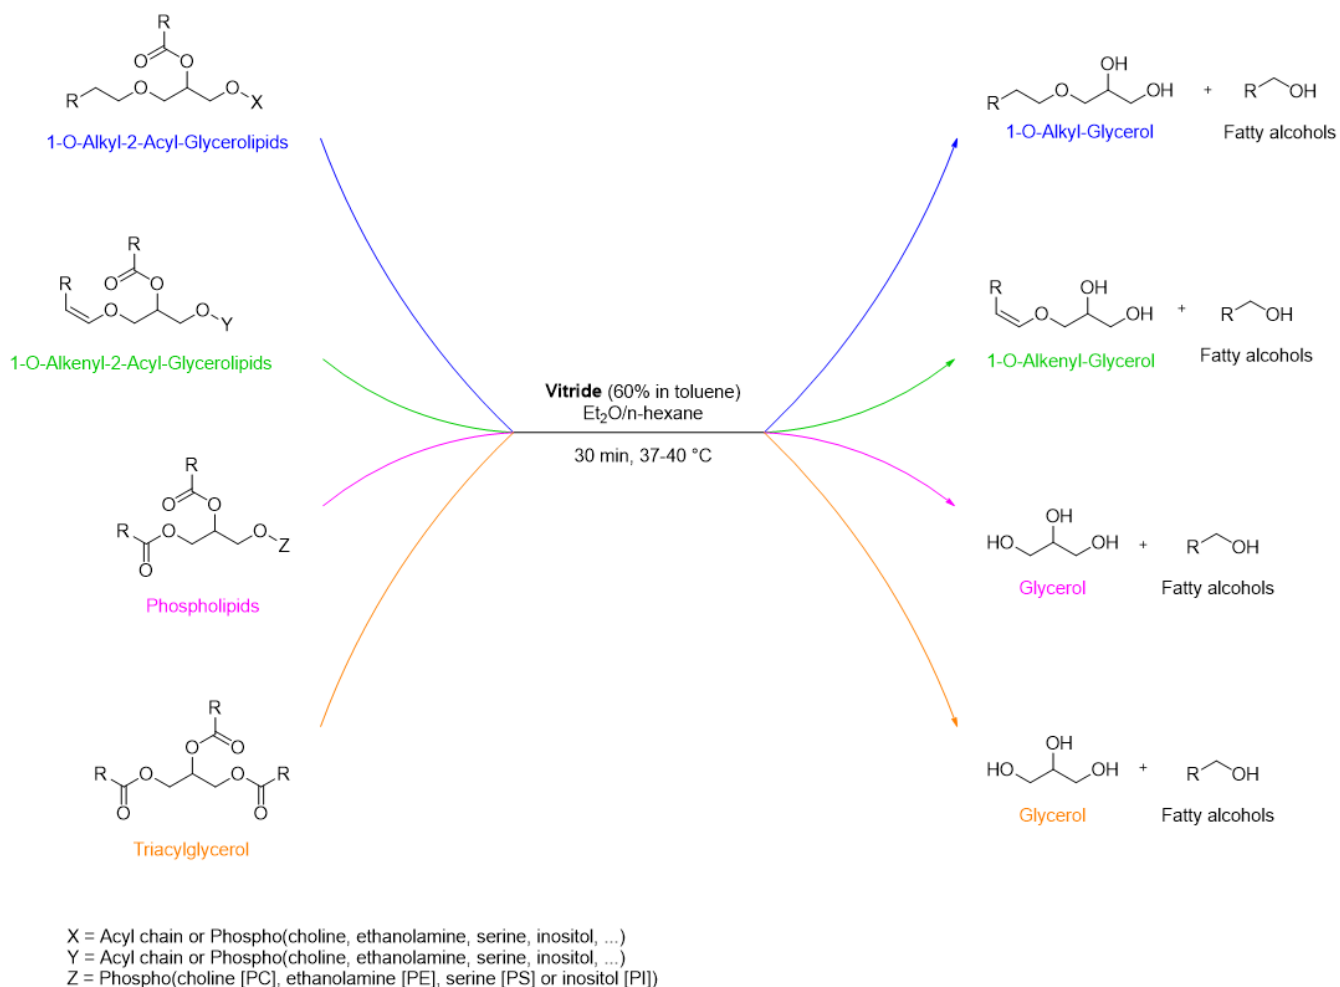

**Figure S6. Reduction with Vitride® of different lipids.** Vitride® reduces ester and phosphate but not ether bonds. Thus ether-glycerophospholipids (1-O-Alkyl-2-Acyl-Glycerolipids and 1-O-Alkenyl-2-Acyl-Glycerolipids) are reduced to ether-glycerols (1-O-Alkyl-Glycerol and 1-O-alkenyl-Glycerol). Phospholipids bearing no ether bond and triacylglycerols are fully reduced to glycerols. Fatty alcohols are formed.  $\text{Et}_2\text{O}$ , diethyl-ether.

**Table S1 : SPE columns tested.**

| SPE column identification                     | Surface chemistry and specificities         | Reference (Macherey-Nagel) | Results        |
|-----------------------------------------------|---------------------------------------------|----------------------------|----------------|
| Chromabond SiOH, 45 $\mu\text{m}$ , 6mL/500mg | Unmodified silica gel (SiOH) – normal phase | 730070                     | Bad separation |



|                                                  |                                                                                                             |        |                                                        |
|--------------------------------------------------|-------------------------------------------------------------------------------------------------------------|--------|--------------------------------------------------------|
| Chromabond HILIC, 45 µm,<br>6mL/500mg            | Ammonium and sulfonic acid modified silica,<br>zwitterionic, polar gel – normal phase                       | 730594 | Excellent separation,<br>alkenyl-lipids<br>degradation |
| Chromabond OH (Diol), 45<br>µm, 6mL/500mg        | Dihydroxypropyle (Diol, OH) modified silica gel<br>– normal phase                                           | 730418 | Bad separation                                         |
| Chromabond NH <sub>2</sub> , 45 µm,<br>6mL/500mg | Aminopropyl (NH <sub>2</sub> ) modified silica phase –<br>normal phase                                      | 730180 | Bad separation                                         |
| Chromabond C18 ec, 45 µm,<br>6mL/500mg           | Octadecyl (ODS, C18 ec, RP18 ec) modified silica<br>phase, endcapped – reversed phase                       | 730014 | Bad separation                                         |
| Chromabond HLB, 45 µm,<br>6mL/500mg              | Hydrophilic-lipophilic balanced (HLB) N-<br>vinylpyrrolidone-divinylbenzene copolymer –<br>reversed phase   | 730927 | Bad separation                                         |
| Chromabond SB, 45 µm,<br>6mL/500mg               | Silica gel with quaternary ammonium<br>modification, strongly basic anion exchanger<br>(SAX) – ion exchange | 730426 | Good separation                                        |

The different stationary phases tested for the solid-phase extraction of the biological samples, their characteristics and the results obtained are listed.
